# Supplementary material for: Inactivation of Invs/Nphp2 in renal epithelial cells drives infantile nephronophthisis like phenotypes in mouse
Source: eLife journal article supplement (doi:10.7554/elife.82395), 2023-03-15
Supplement: supp [file elife_poa_e82395_Figure_6_figure_supplement_1.docx]

**Figure 6-figure supplement 1.** (A) A diagram of INVS structure and CRISPR targets. (B) ANKS6 (green) is absent from the INVS compartment (arrow) of cilia. Cilia are labelled by anti-acetylated tubulin (Ace-tub, red) in mutant clones CR81 and CR84.
