# Supplementary material for: Inactivation of Invs/Nphp2 in renal epithelial cells drives infantile nephronophthisis like phenotypes in mouse
Source: eLife journal article supplement (doi:10.7554/elife.82395), 2023-03-15
Supplement: supp [file elife_poa_e82395_Figure_7_figure_supplement_1.docx]

**Figure 7-figure supplement 1.** (A) Decrease of body weight of *Invsflox/flox;Cdh16-Cre* and *Invsflox/flox;Pkhd1-Cre* at P28 compared to littermate controls. Percentage of body weight reduction is defined as the difference between littermate control and mutant body weight divided by littermate control body weight. Open labels indicate males and filled labels indicate females. (B) Average body weight curve of *Invsflox/flox;Cdh16-Cre* and *Invsflox/flox;Pkhd1-Cre* female mice. Ctrl: littermate control; ***: p<0.001.

**Figure 7-figure supplement 1 source data:** Related to A and B.
