# Supplementary material for: Inactivation of Invs/Nphp2 in renal epithelial cells drives infantile nephronophthisis like phenotypes in mouse
Source: eLife journal article supplement (doi:10.7554/elife.82395), 2023-03-15
Supplement: supp [file Invs Pkhd1-Cre and Invs Cdh16-Cre Body Weight P9-P28 Female.xlsx]

## Sheet: Sheet1
	P9	P10	P11	P12	P13	P14	P15	P16	P17	P18	P19	P20	P21	P22	P23	P24	P25	P26	P27	P28
Invsflox/flox;Pkhd1-Cre Female	6.4	6.8	7.3	7.8	8	8.4	8.3	8.8	8.9	9	9	9.4	9.8	10.3	10.7	10.7	10.7	11	11.1	11.4
Invsflox/flox;Pkhd1-Cre Female	6.6	7.3	7.6	8.1	8.4	8.6	8.7	8.7	8.7	9	9.2	9.4	10.1	10.5	11	11.1	11.3	11.8	11.8	12.1
Invsflox/flox;Pkhd1-Cre Female	6.3	6.6	7.1	7.7	7.9	8.3	8.4	8.5	8.5	8.9	8.7	9	9.4	9.9	10.5	10.6	10.6	11.1	11.2	11.5
Invsflox/flox;Pkhd1-Cre Female	6.5	6.9	7.3	7.9	8.3	8.8	9.1	9.6	9.6	9.6	9.7	9.9	10.1	10.4	10.9	10.8	11.2	11.6	12	13.3
Invsflox/flox;Pkhd1-Cre Female	5.1	5.5	6.1	6.5	6.8	7.3	7.8	8.2	8.3	8.3	8.5	8.7	9	9.2	9.9	9.9	10.3	10.7	11.3	12
	6.18	6.62	7.08	7.6	7.88	8.28	8.46	8.76	8.8	8.96	9.02	9.28	9.68	10.06	10.6	10.62	10.82	11.24	11.48	12.06
Ctrl Female	6.3	6.7	7	7.6	7.8	8.3	8.4	8.6	8.8	8.8	8.9	9.2	9.9	11.1	12	12.4	12.8	13.4	13.7	14.1
Ctrl Female	5.7	6.2	6.6	7	7.2	7.4	7.8	8.1	8.2	8.5	8.7	8.9	9.5	10.3	11.1	11.8	12.2	12.9	13.6	14
Ctrl Female	6.6	7	7.6	8.3	8.8	9	9.3	9.6	9.3	9.5	9.6	9.9	10.2	10.9	11.2	11.4	12.1	12.8	13.5	14.4
Ctrl Female	5.3	5.7	6.2	6.8	7.5	7.9	8.2	8.6	8.6	8.5	8.7	8.9	9	9.6	10.2	11	11.5	11.7	12.9	13.5
Ctrl Female	6.4	6.9	7.4	7.9	8.6	8.8	9.3	9.8	9.5	9.6	9.9	10.1	10.2	10.6	11	11.2	11.9	12.4	13.4	13.9
	6.06	6.5	6.96	7.52	7.98	8.28	8.6	8.94	8.88	8.98	9.16	9.4	9.76	10.5	11.1	11.56	12.1	12.64	13.42	13.98
	P9	P10	P11	P12	P13	P14	P15	P16	P17	P18	P19	P20	P21	P22	P23	P24	P25	P26	P27	P28
Invs flox/flox;Pkhd1-Cre	6.18	6.62	7.08	7.6	7.88	8.28	8.46	8.76	8.8	8.96	9.02	9.28	9.68	10.06	10.6	10.62	10.82	11.24	11.48	12.06
Ctrl	6.06	6.5	6.96	7.52	7.98	8.28	8.6	8.94	8.88	8.98	9.16	9.4	9.76	10.5	11.1	11.56	12.1	12.64	13.42	13.98
	P9	P10	P11	P12	P13	P14	P15	P16	P17	P18	P19	P20	P21	P22	P23	P24	P25	P26	P27	P28
Invsflox/flox;Cdh16-Cre Female	4.7	5.1	5.5	5.9	6.4	6.5	6.7	6.9	7	7.2	7.1	7	7	7.1	6.8	6.8	6.5	6.1	6	6
Invsflox/flox;Cdh16-Cre Female	4.6	4.9	5.1	5.7	5.9	6.2	6.1	6	5.6	5.6	5.5	5.7	5.9	6.3	6.6	6.7	6.8	6.9	7	7.3
	4.65	5	5.3	5.8	6.15	6.35	6.4	6.45	6.3	6.4	6.3	6.35	6.45	6.7	6.7	6.75	6.65	6.5	6.5	6.65
Ctrl Female	4.6	5	5.5	5.8	6	6.2	6.5	6.5	6.5	6.4	6.6	7	7.7	8.2	8.7	9.8	10.7	11.5	12.1	12.9
Ctrl Female	4.1	4.2	4.4	4.6	4.9	5.1	5.3	5.4	5.3	5.3	5.1	5.6	5.8	6.5	6.7	7.2	8.1	9	9.6	10.3
	4.35	4.6	4.95	5.2	5.45	5.65	5.9	5.95	5.9	5.85	5.85	6.3	6.75	7.35	7.7	8.5	9.4	10.25	10.85	11.6
	P9	P10	P11	P12	P13	P14	P15	P16	P17	P18	P19	P20	P21	P22	P23	P24	P25	P26	P27	P28
Invs flox/flox;Cdh16-Cre	4.65	5	5.3	5.8	6.15	6.35	6.4	6.45	6.3	6.4	6.3	6.35	6.45	6.7	6.7	6.75	6.65	6.5	6.5	6.65
Ctrl	4.35	4.6	4.95	5.2	5.45	5.65	5.9	5.95	5.9	5.85	5.85	6.3	6.75	7.35	7.7	8.5	9.4	10.25	10.85	11.6
