# Supplementary figures and images for: Inactivation of Invs/Nphp2 in renal epithelial cells drives infantile nephronophthisis like phenotypes in mouse
Source: eLife journal article supplement (doi:10.7554/elife.82395), 2023-03-15

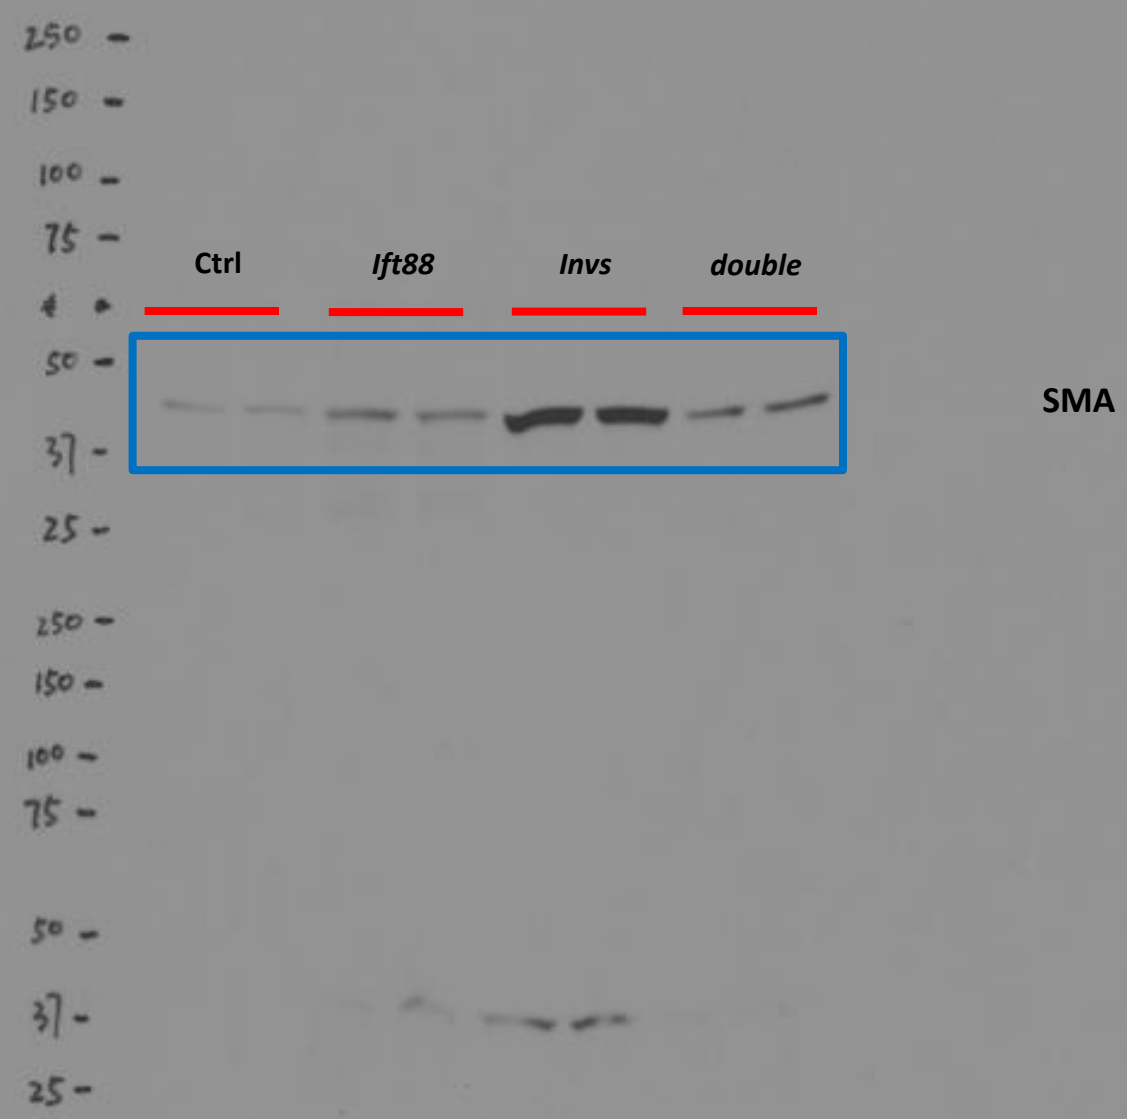

7.5% gel SMA

2

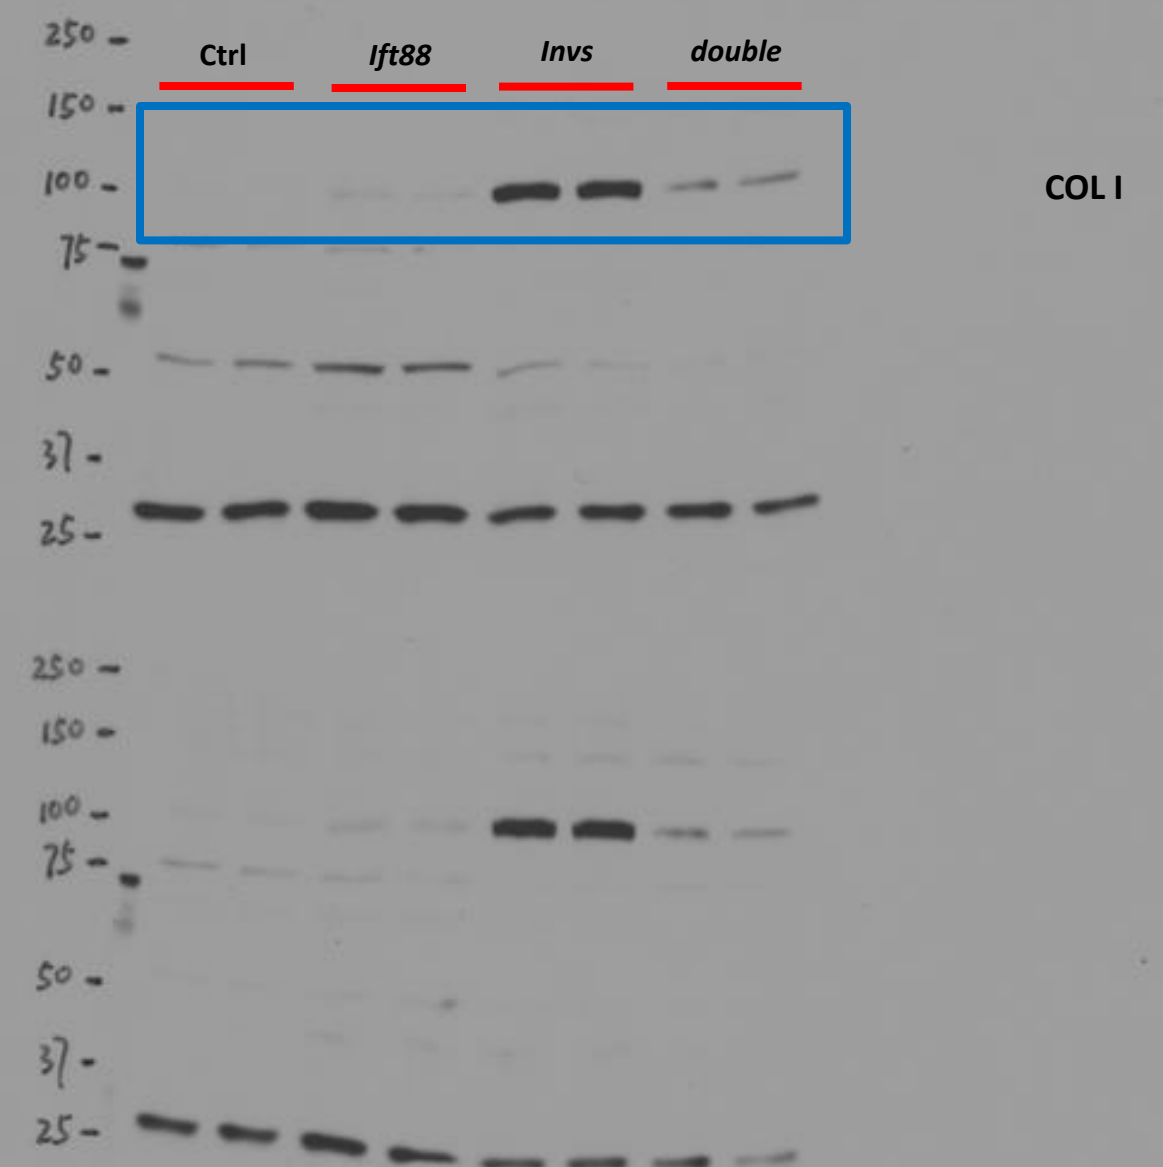

7.5% gel COL1

4

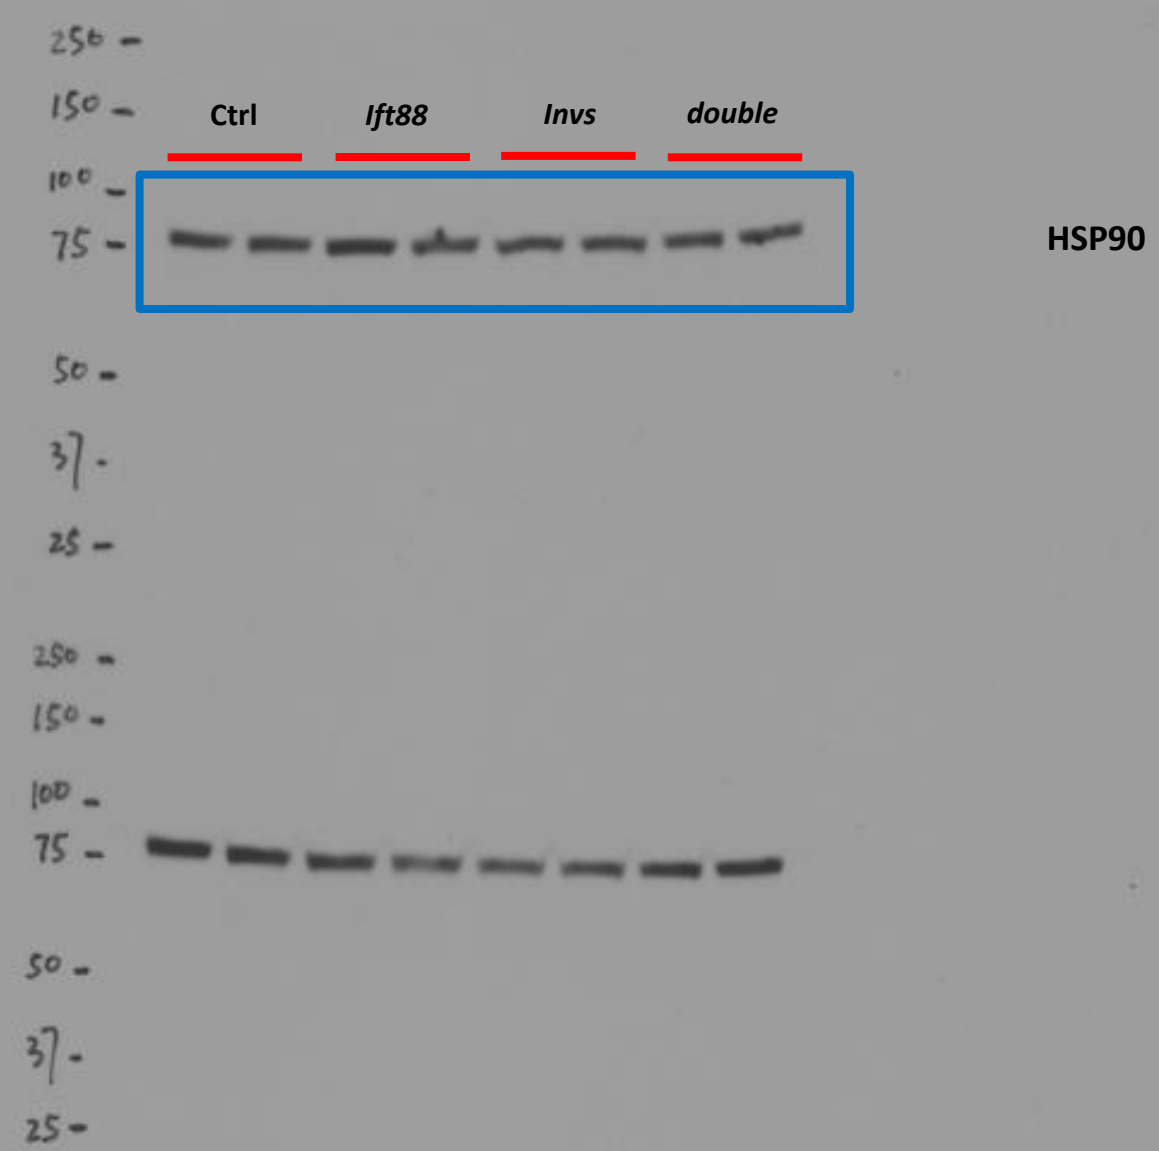

7.5% Hsp90

2

Supplement: supp [file Fig 5J.pdf › Fig 5 Source data/Fig 5J Western Blot/Fig 5J.pdf]

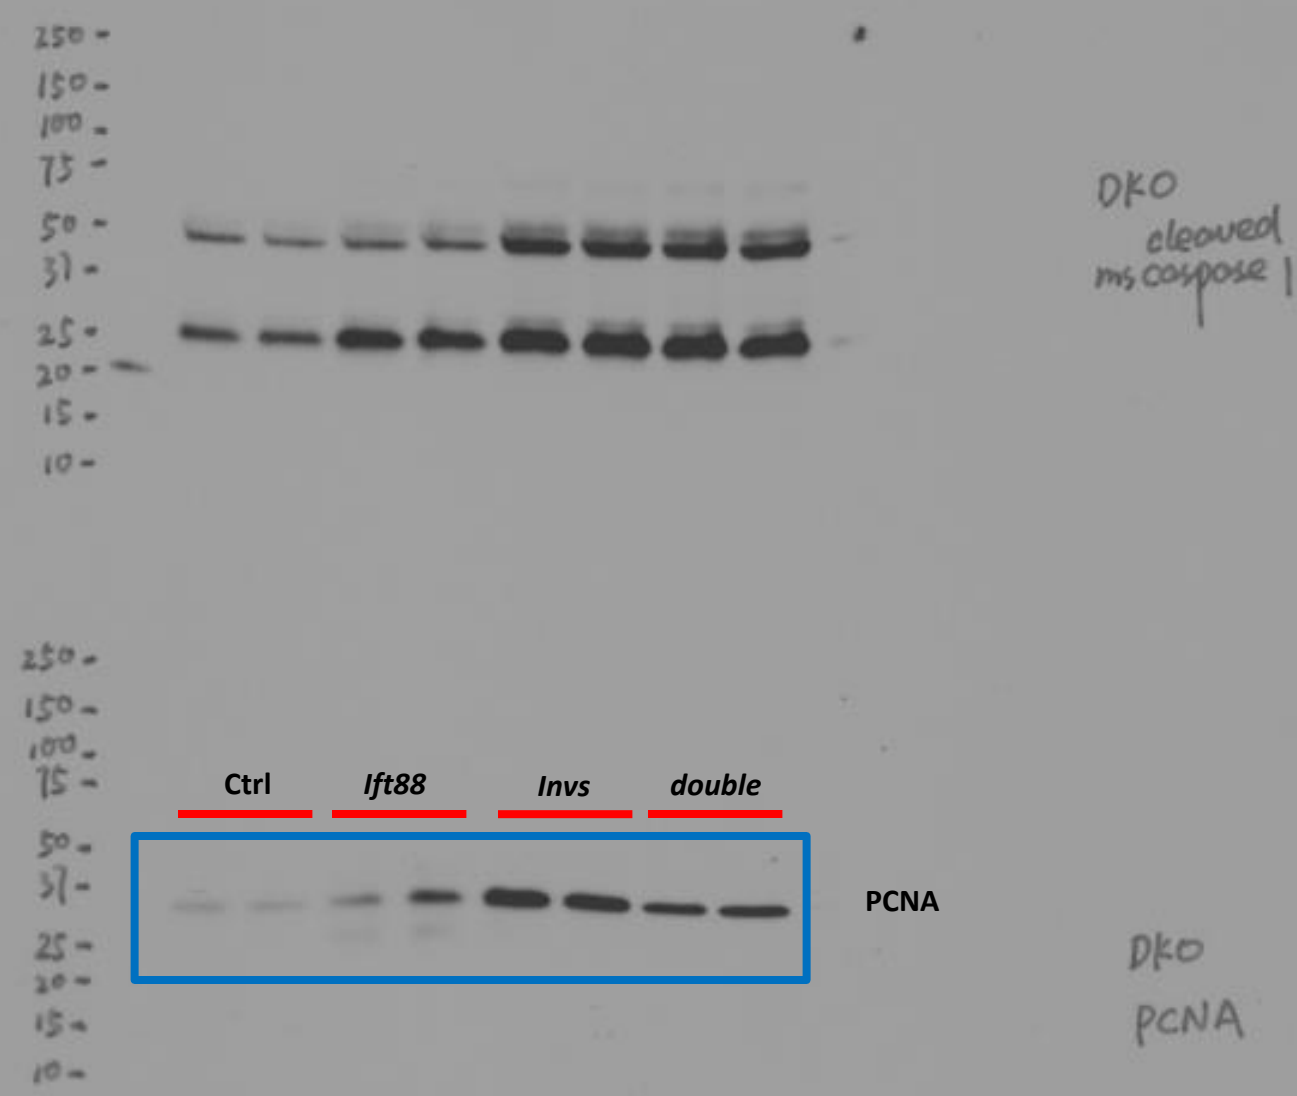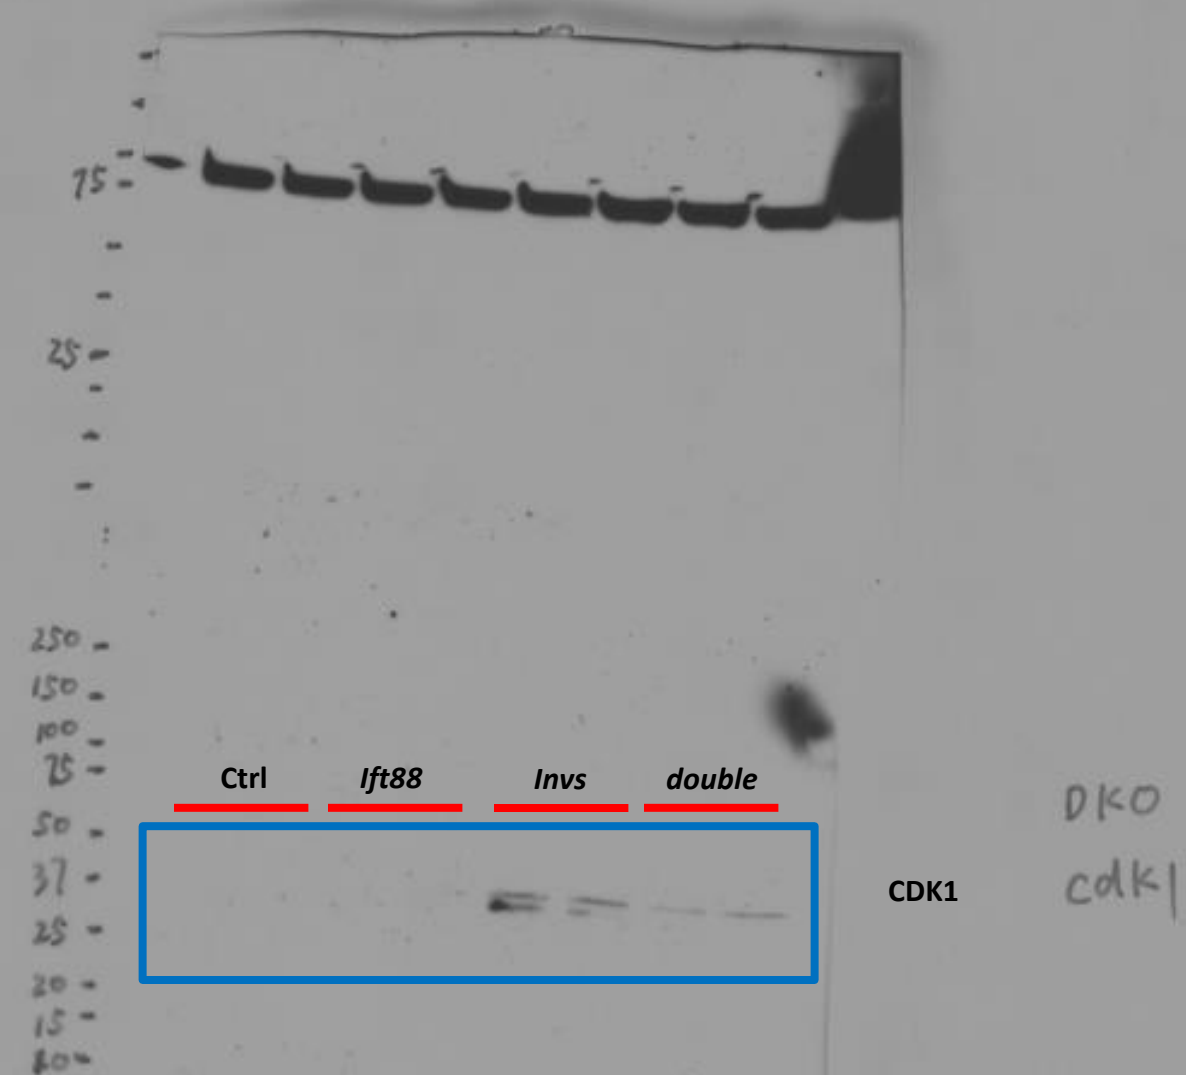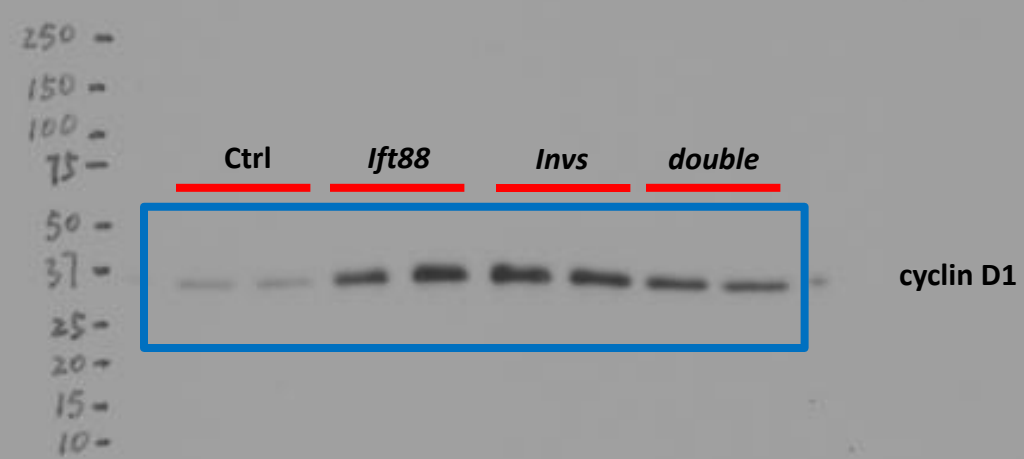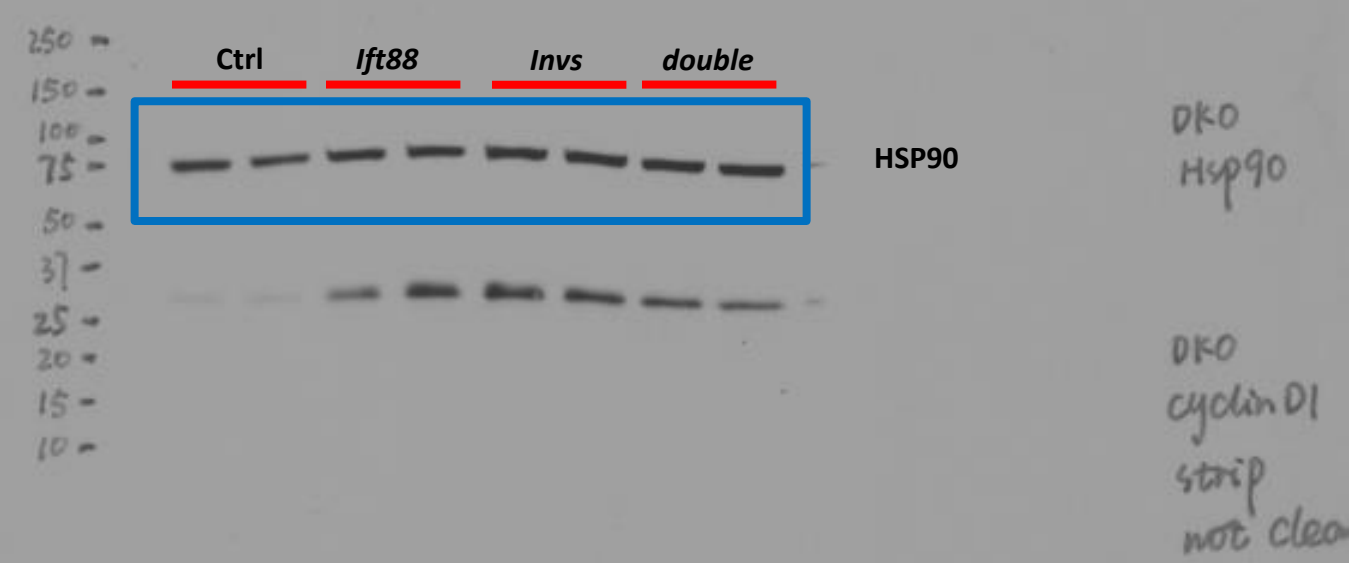

Supplement: supp [file Fig 6C.pdf › Fig 6 Source data/Fig 6C Western blot/Fig 6C.pdf]

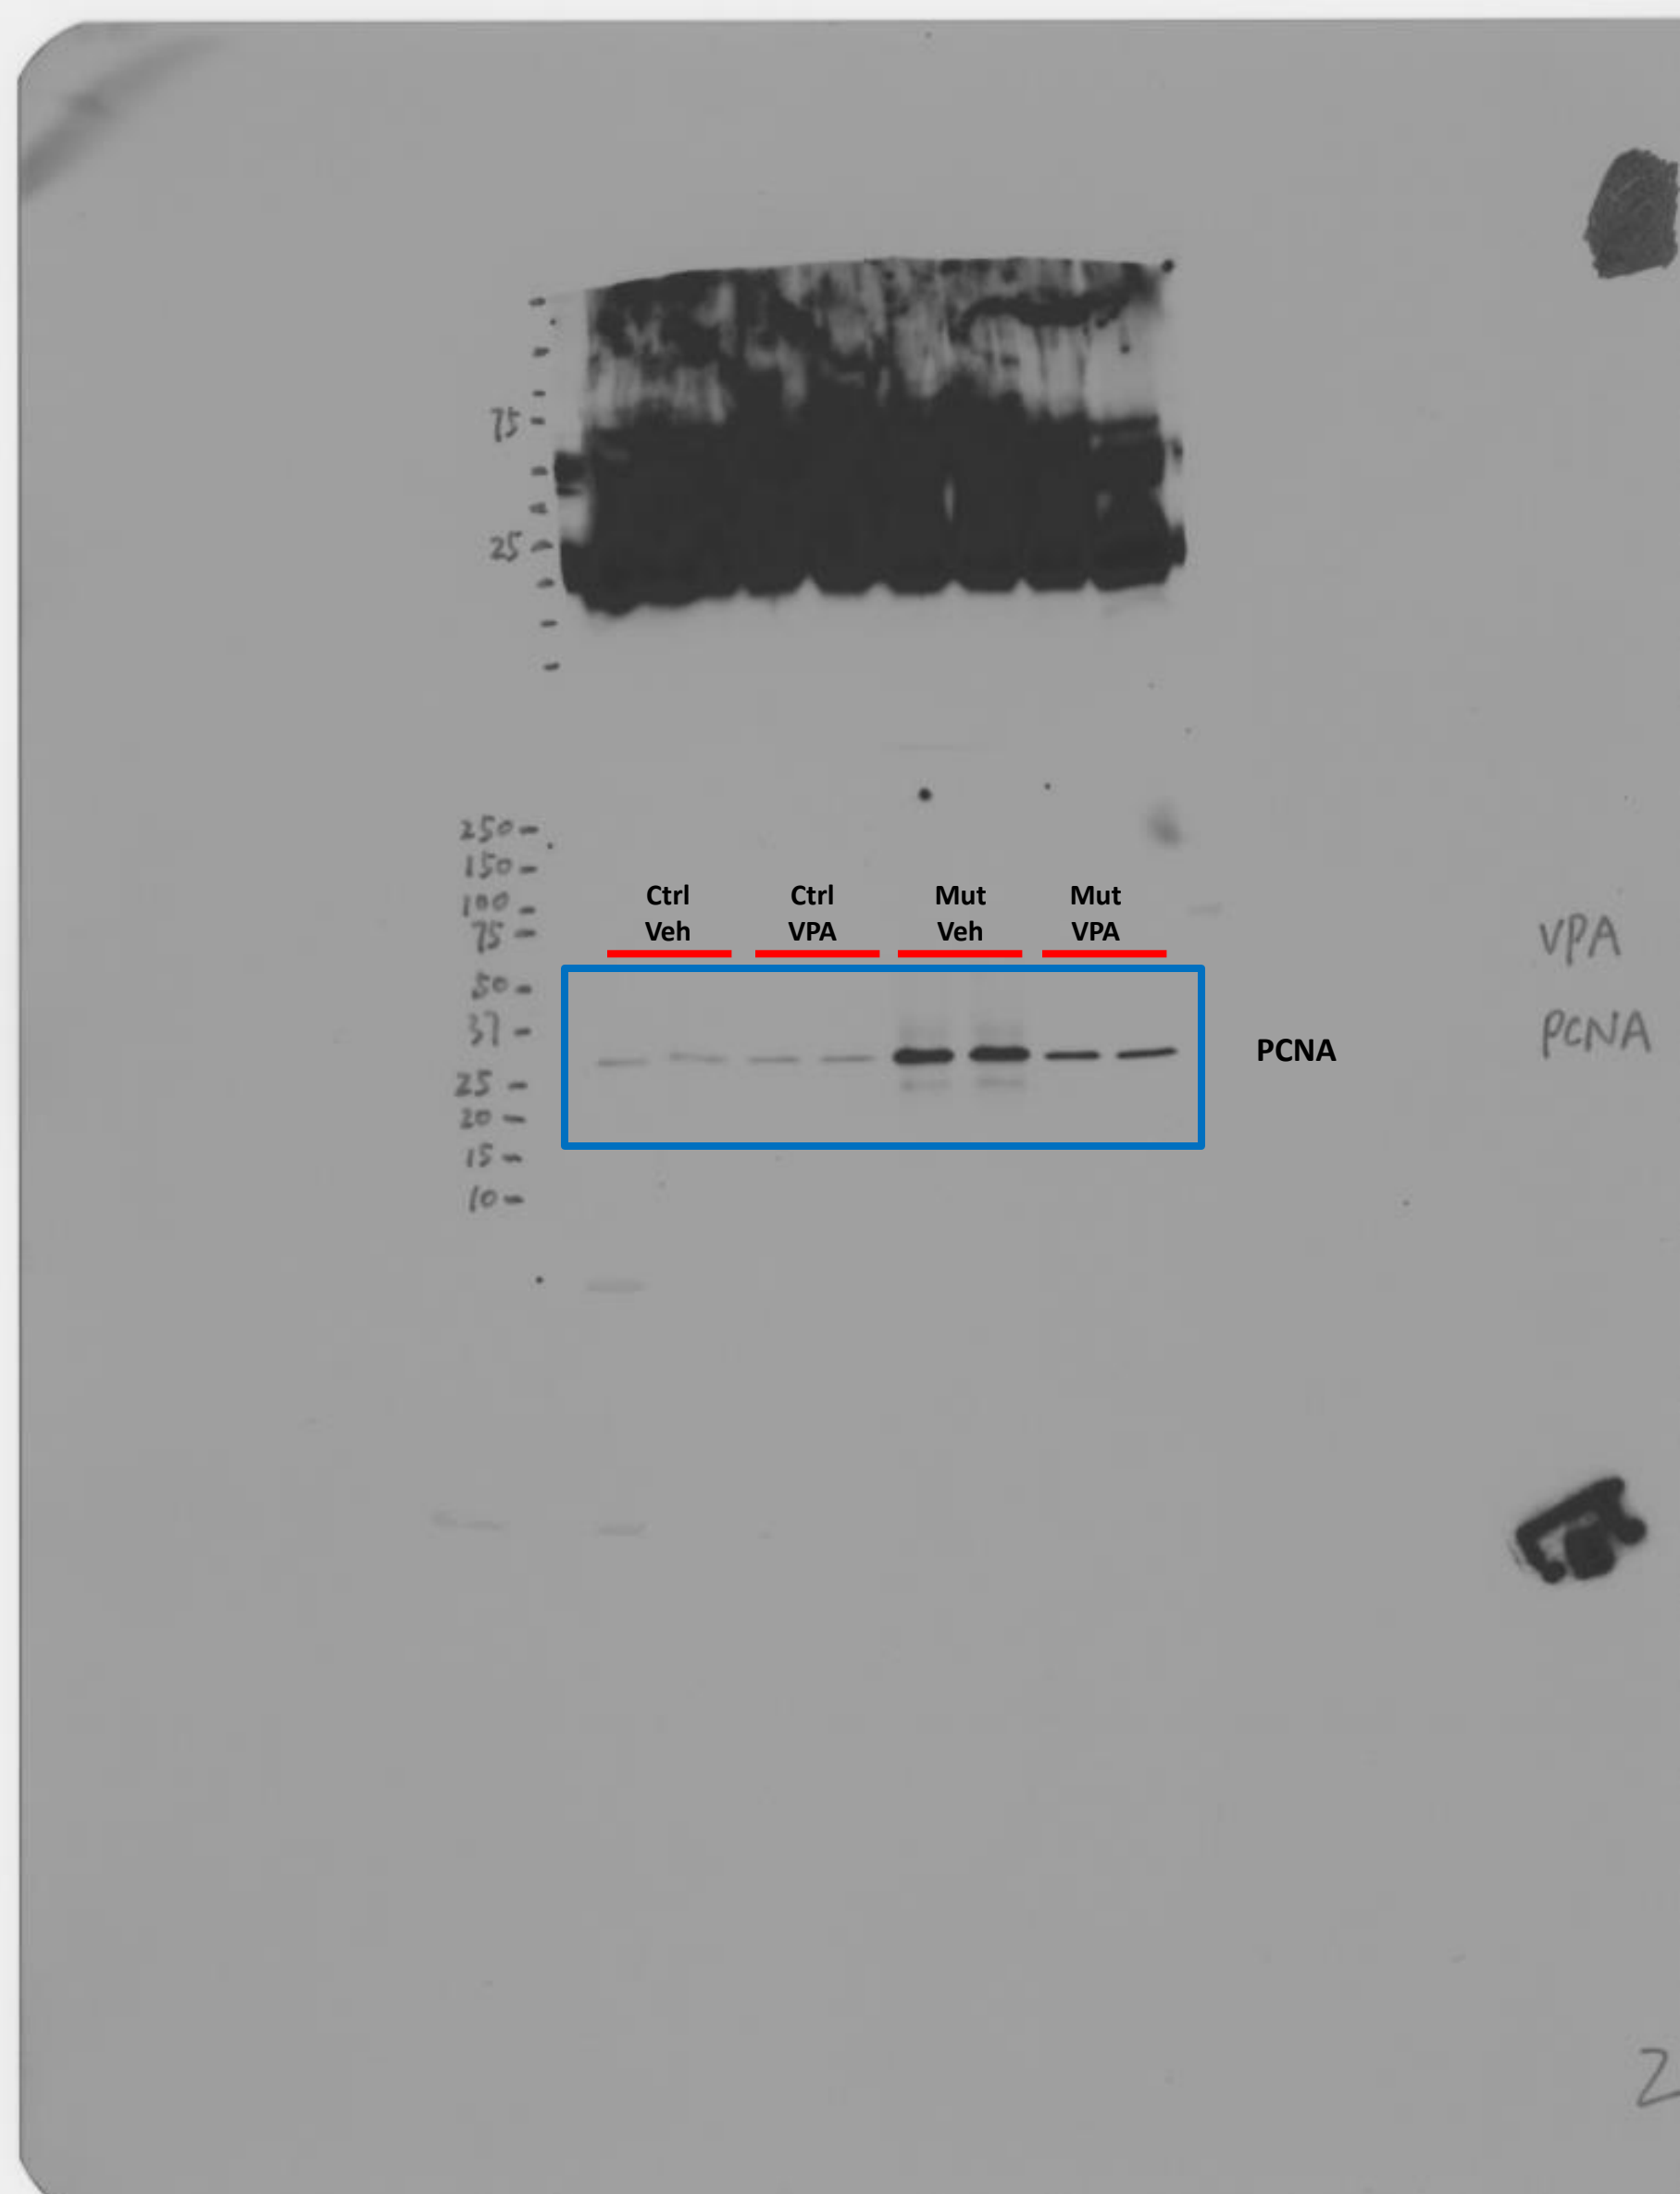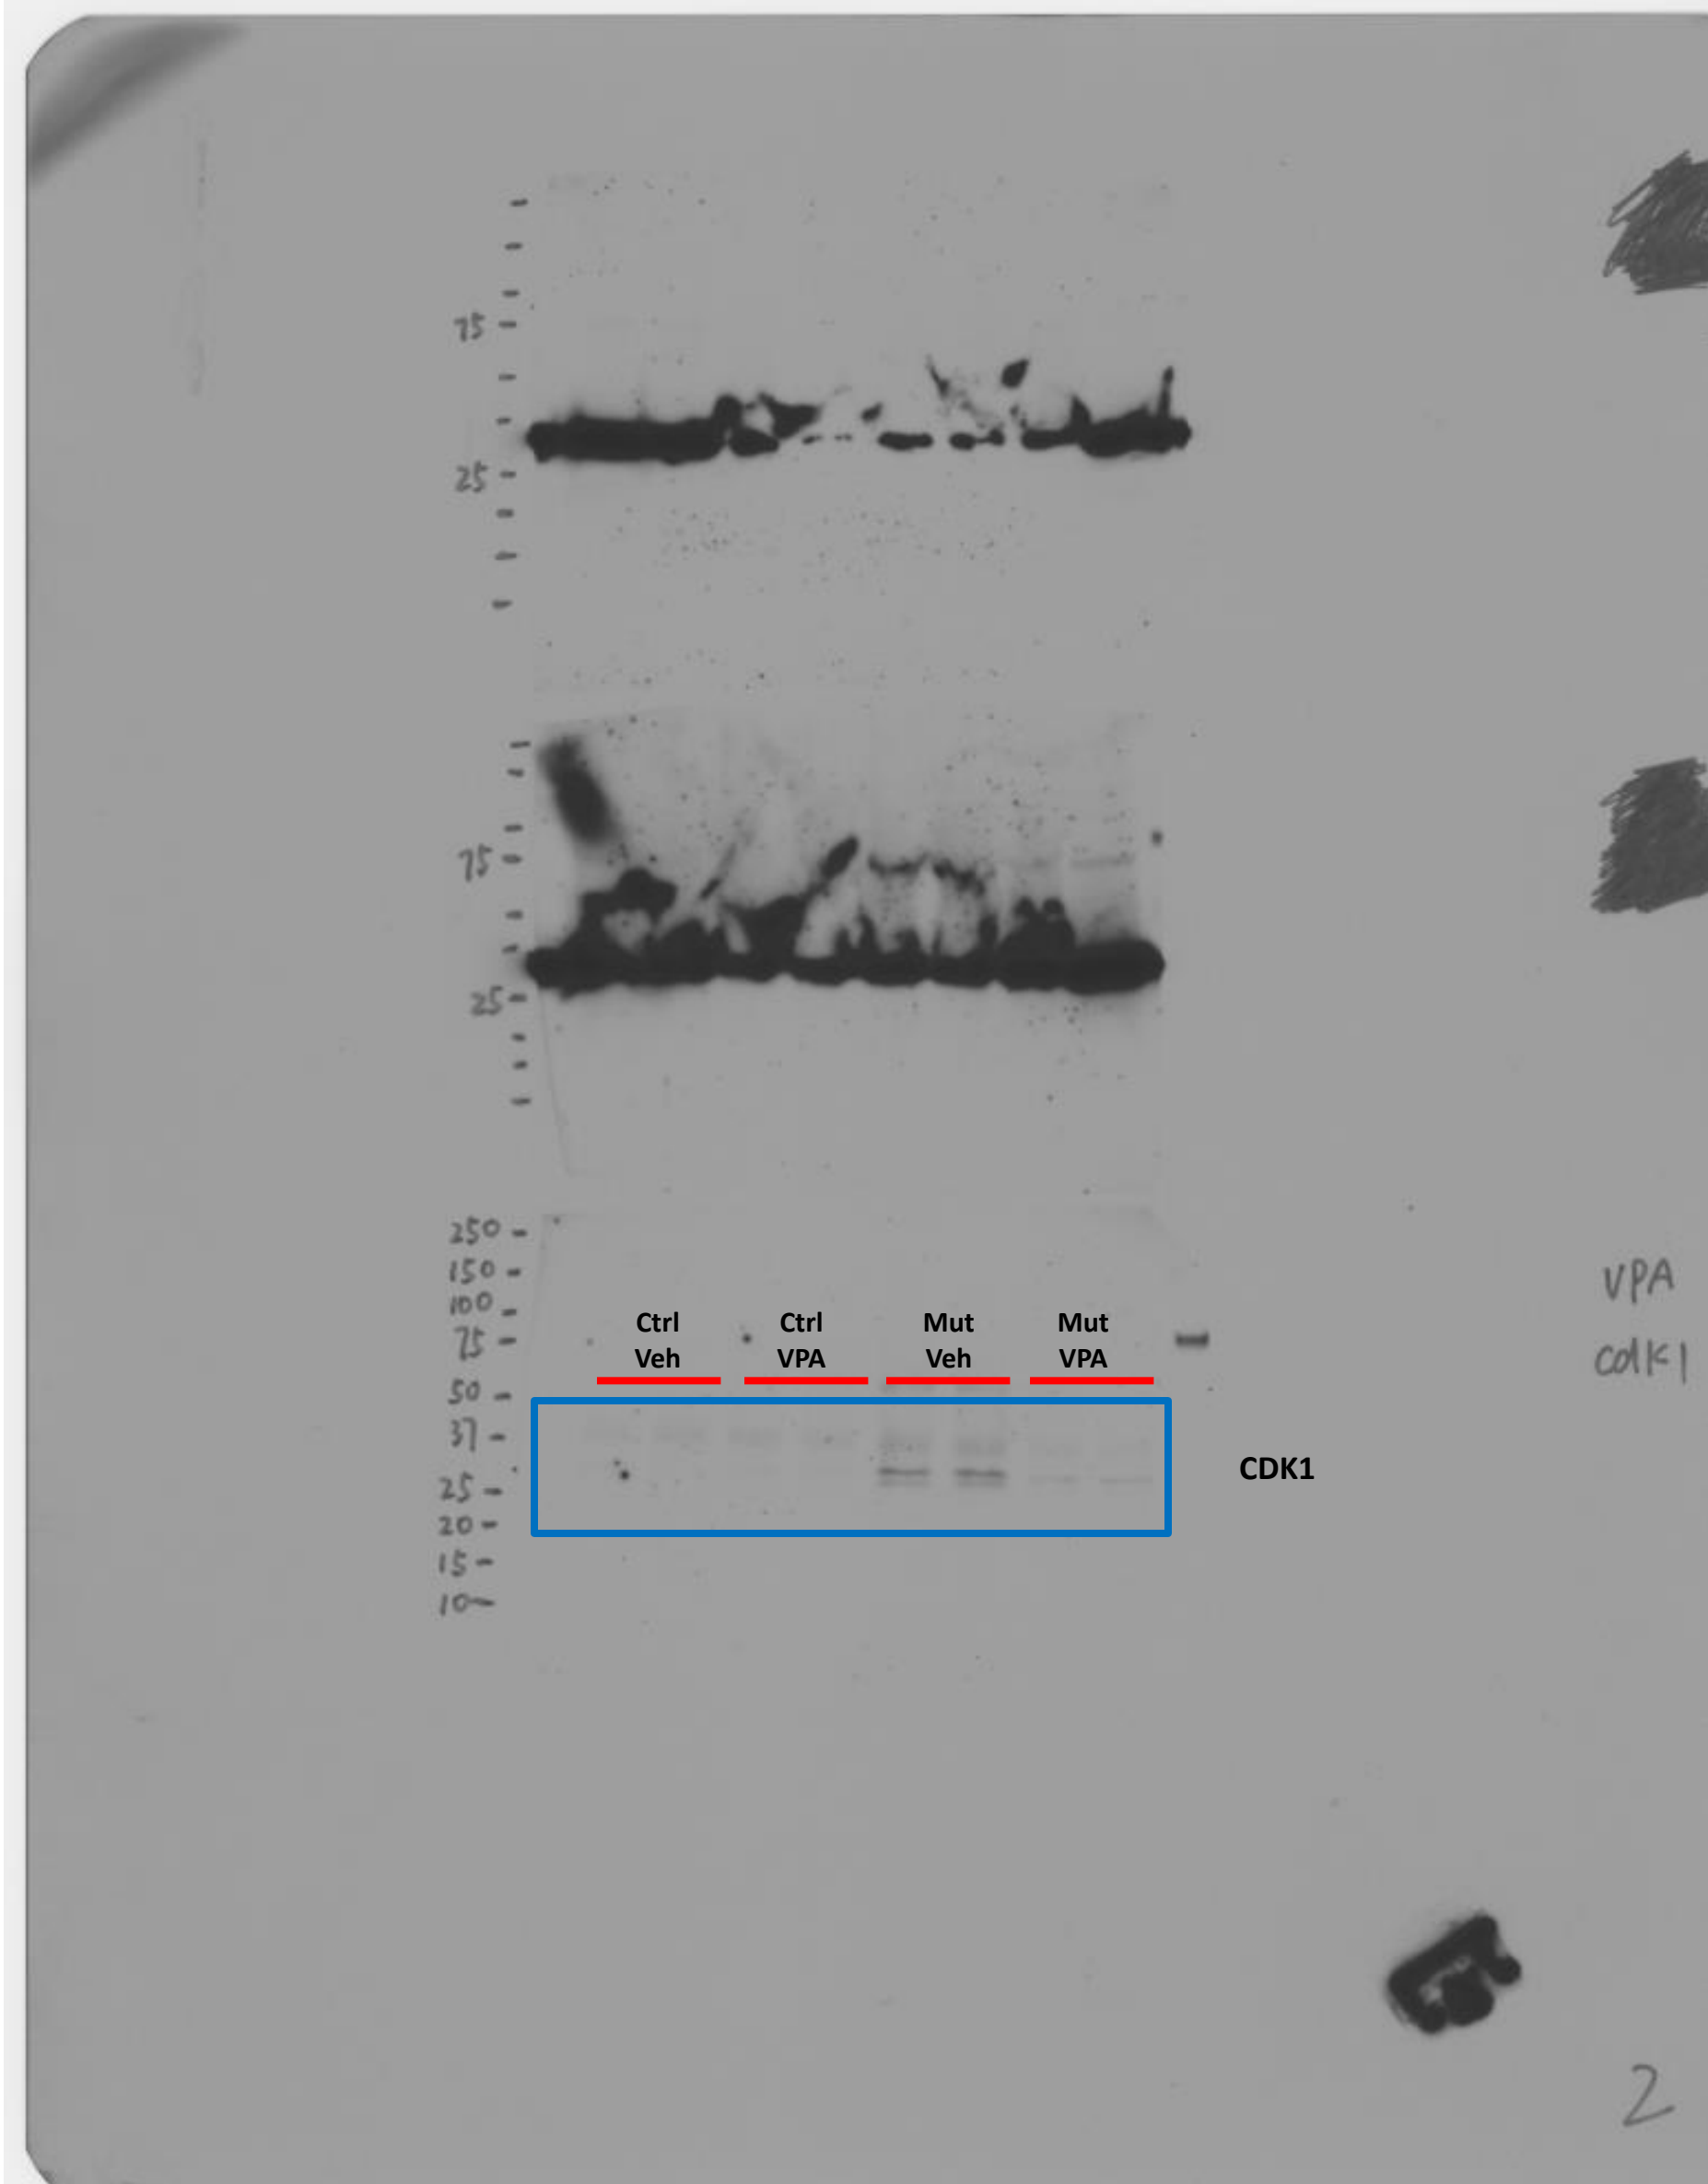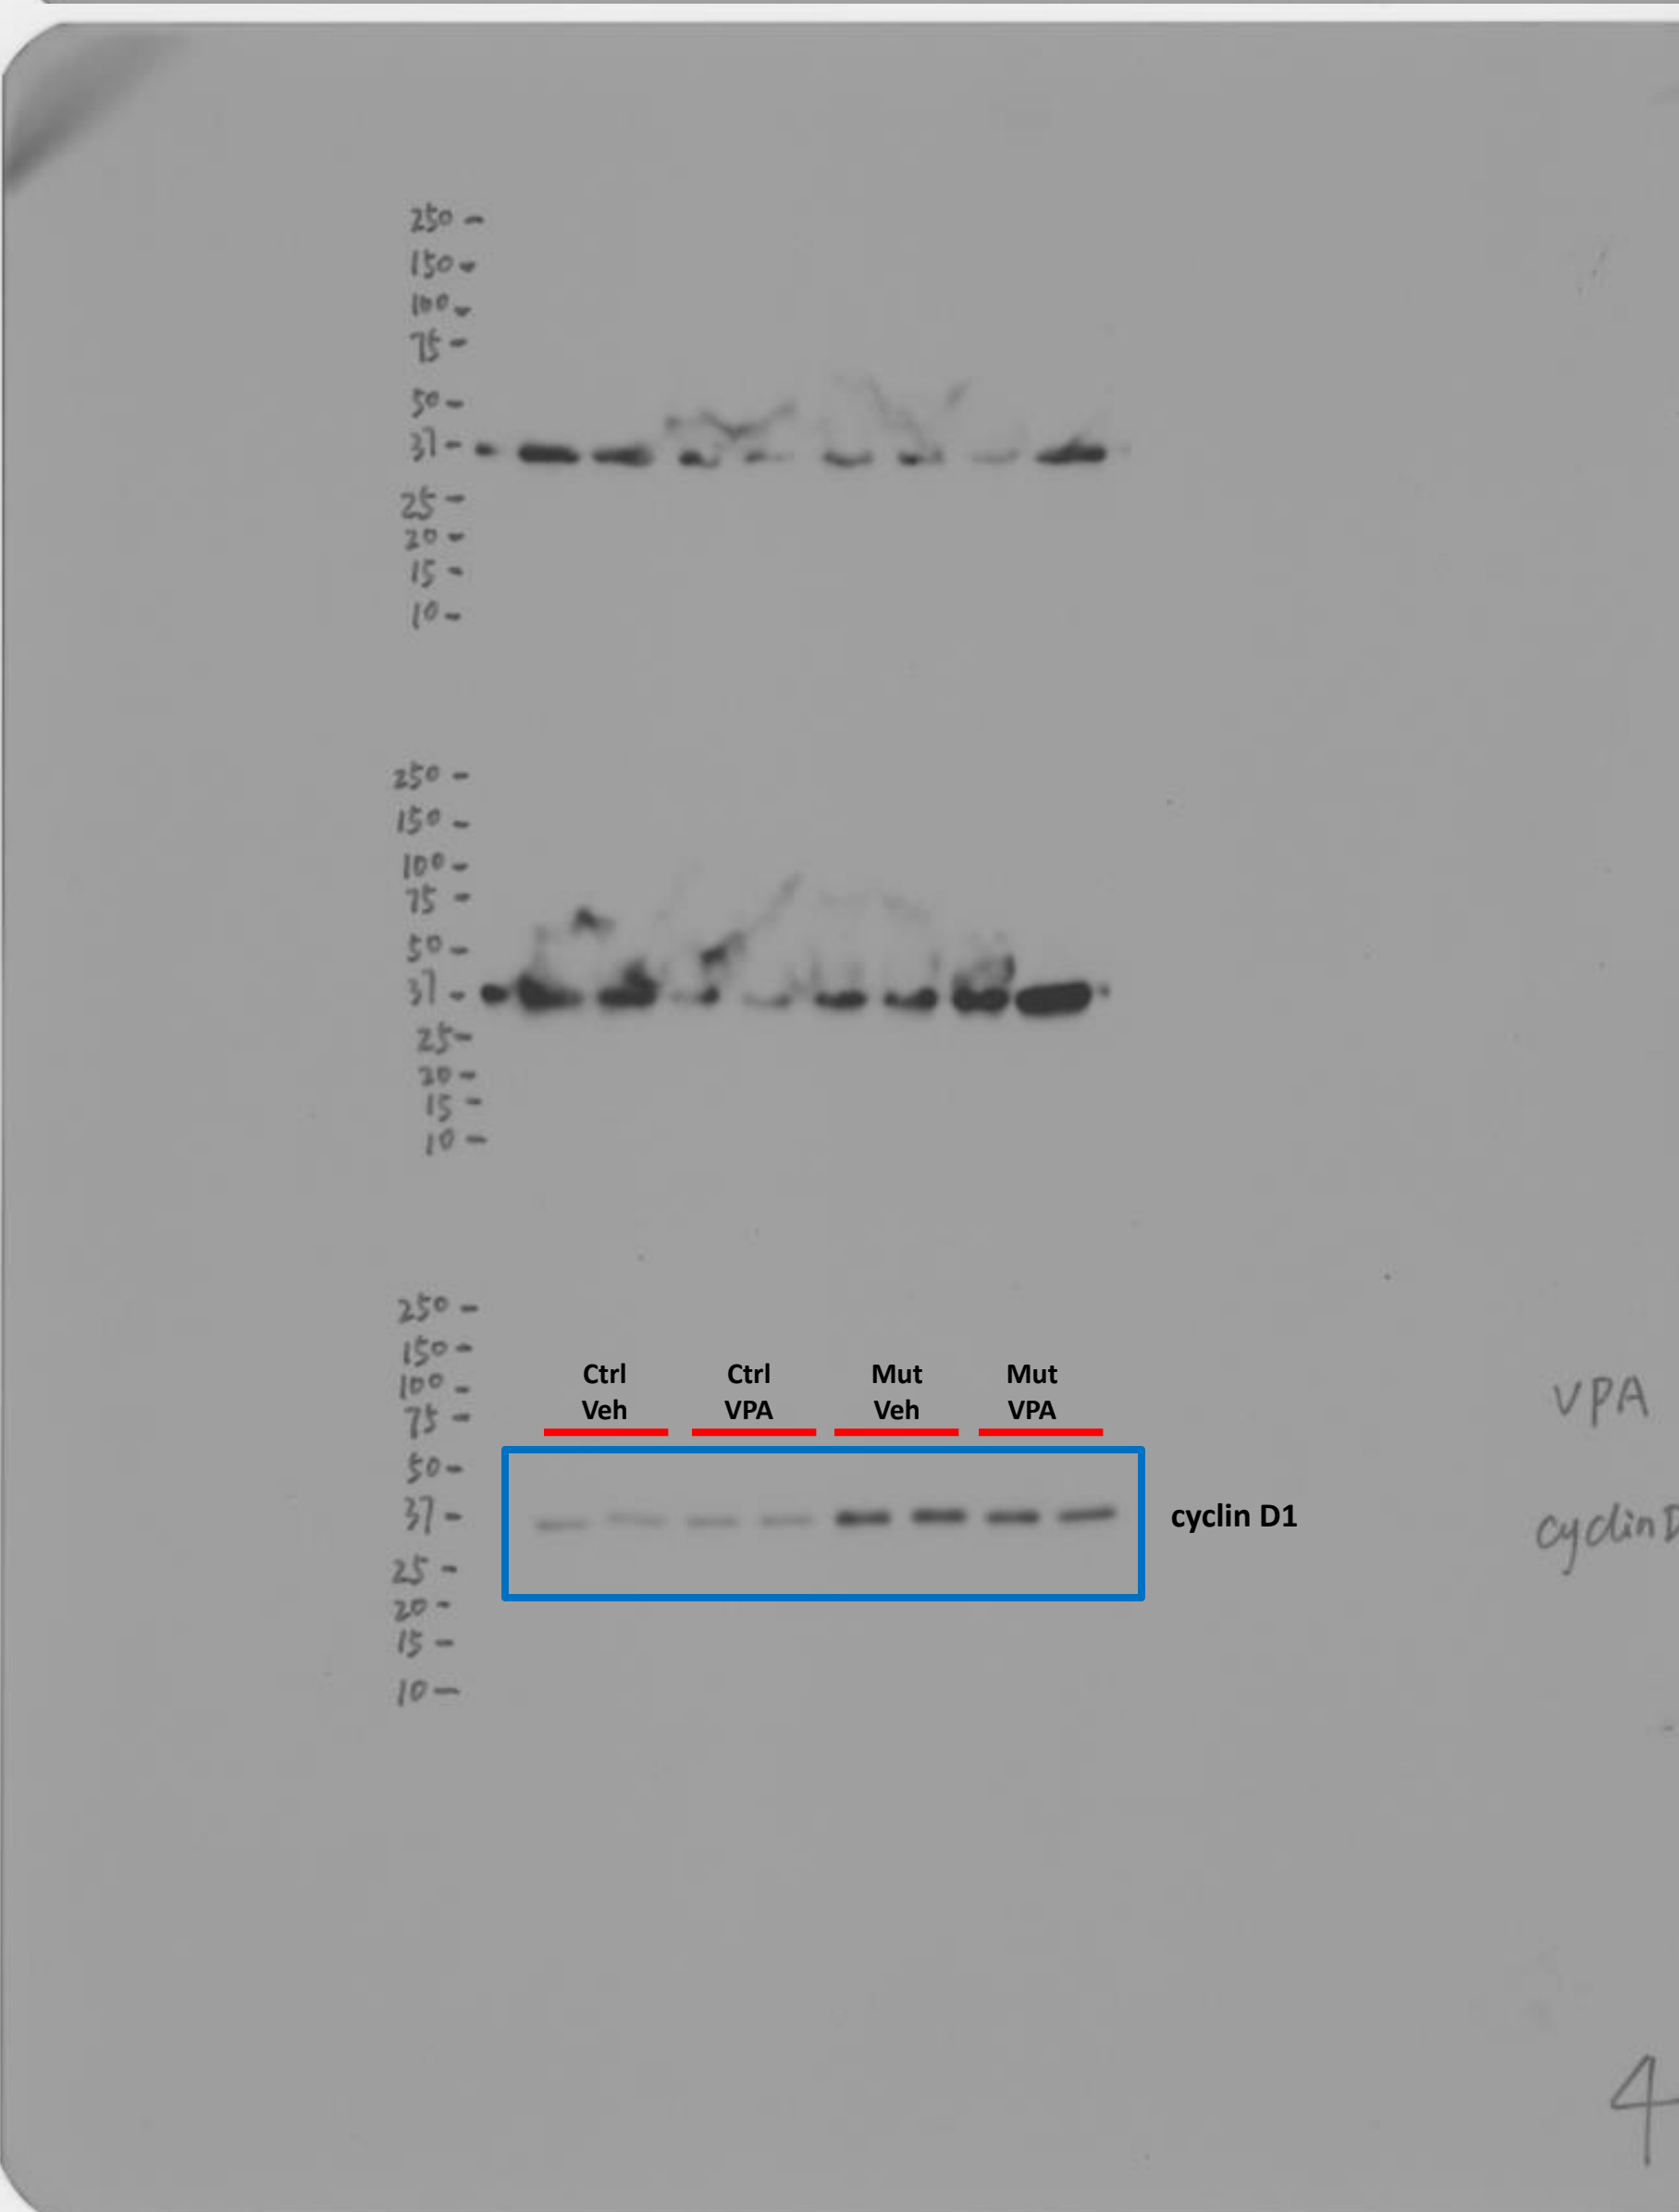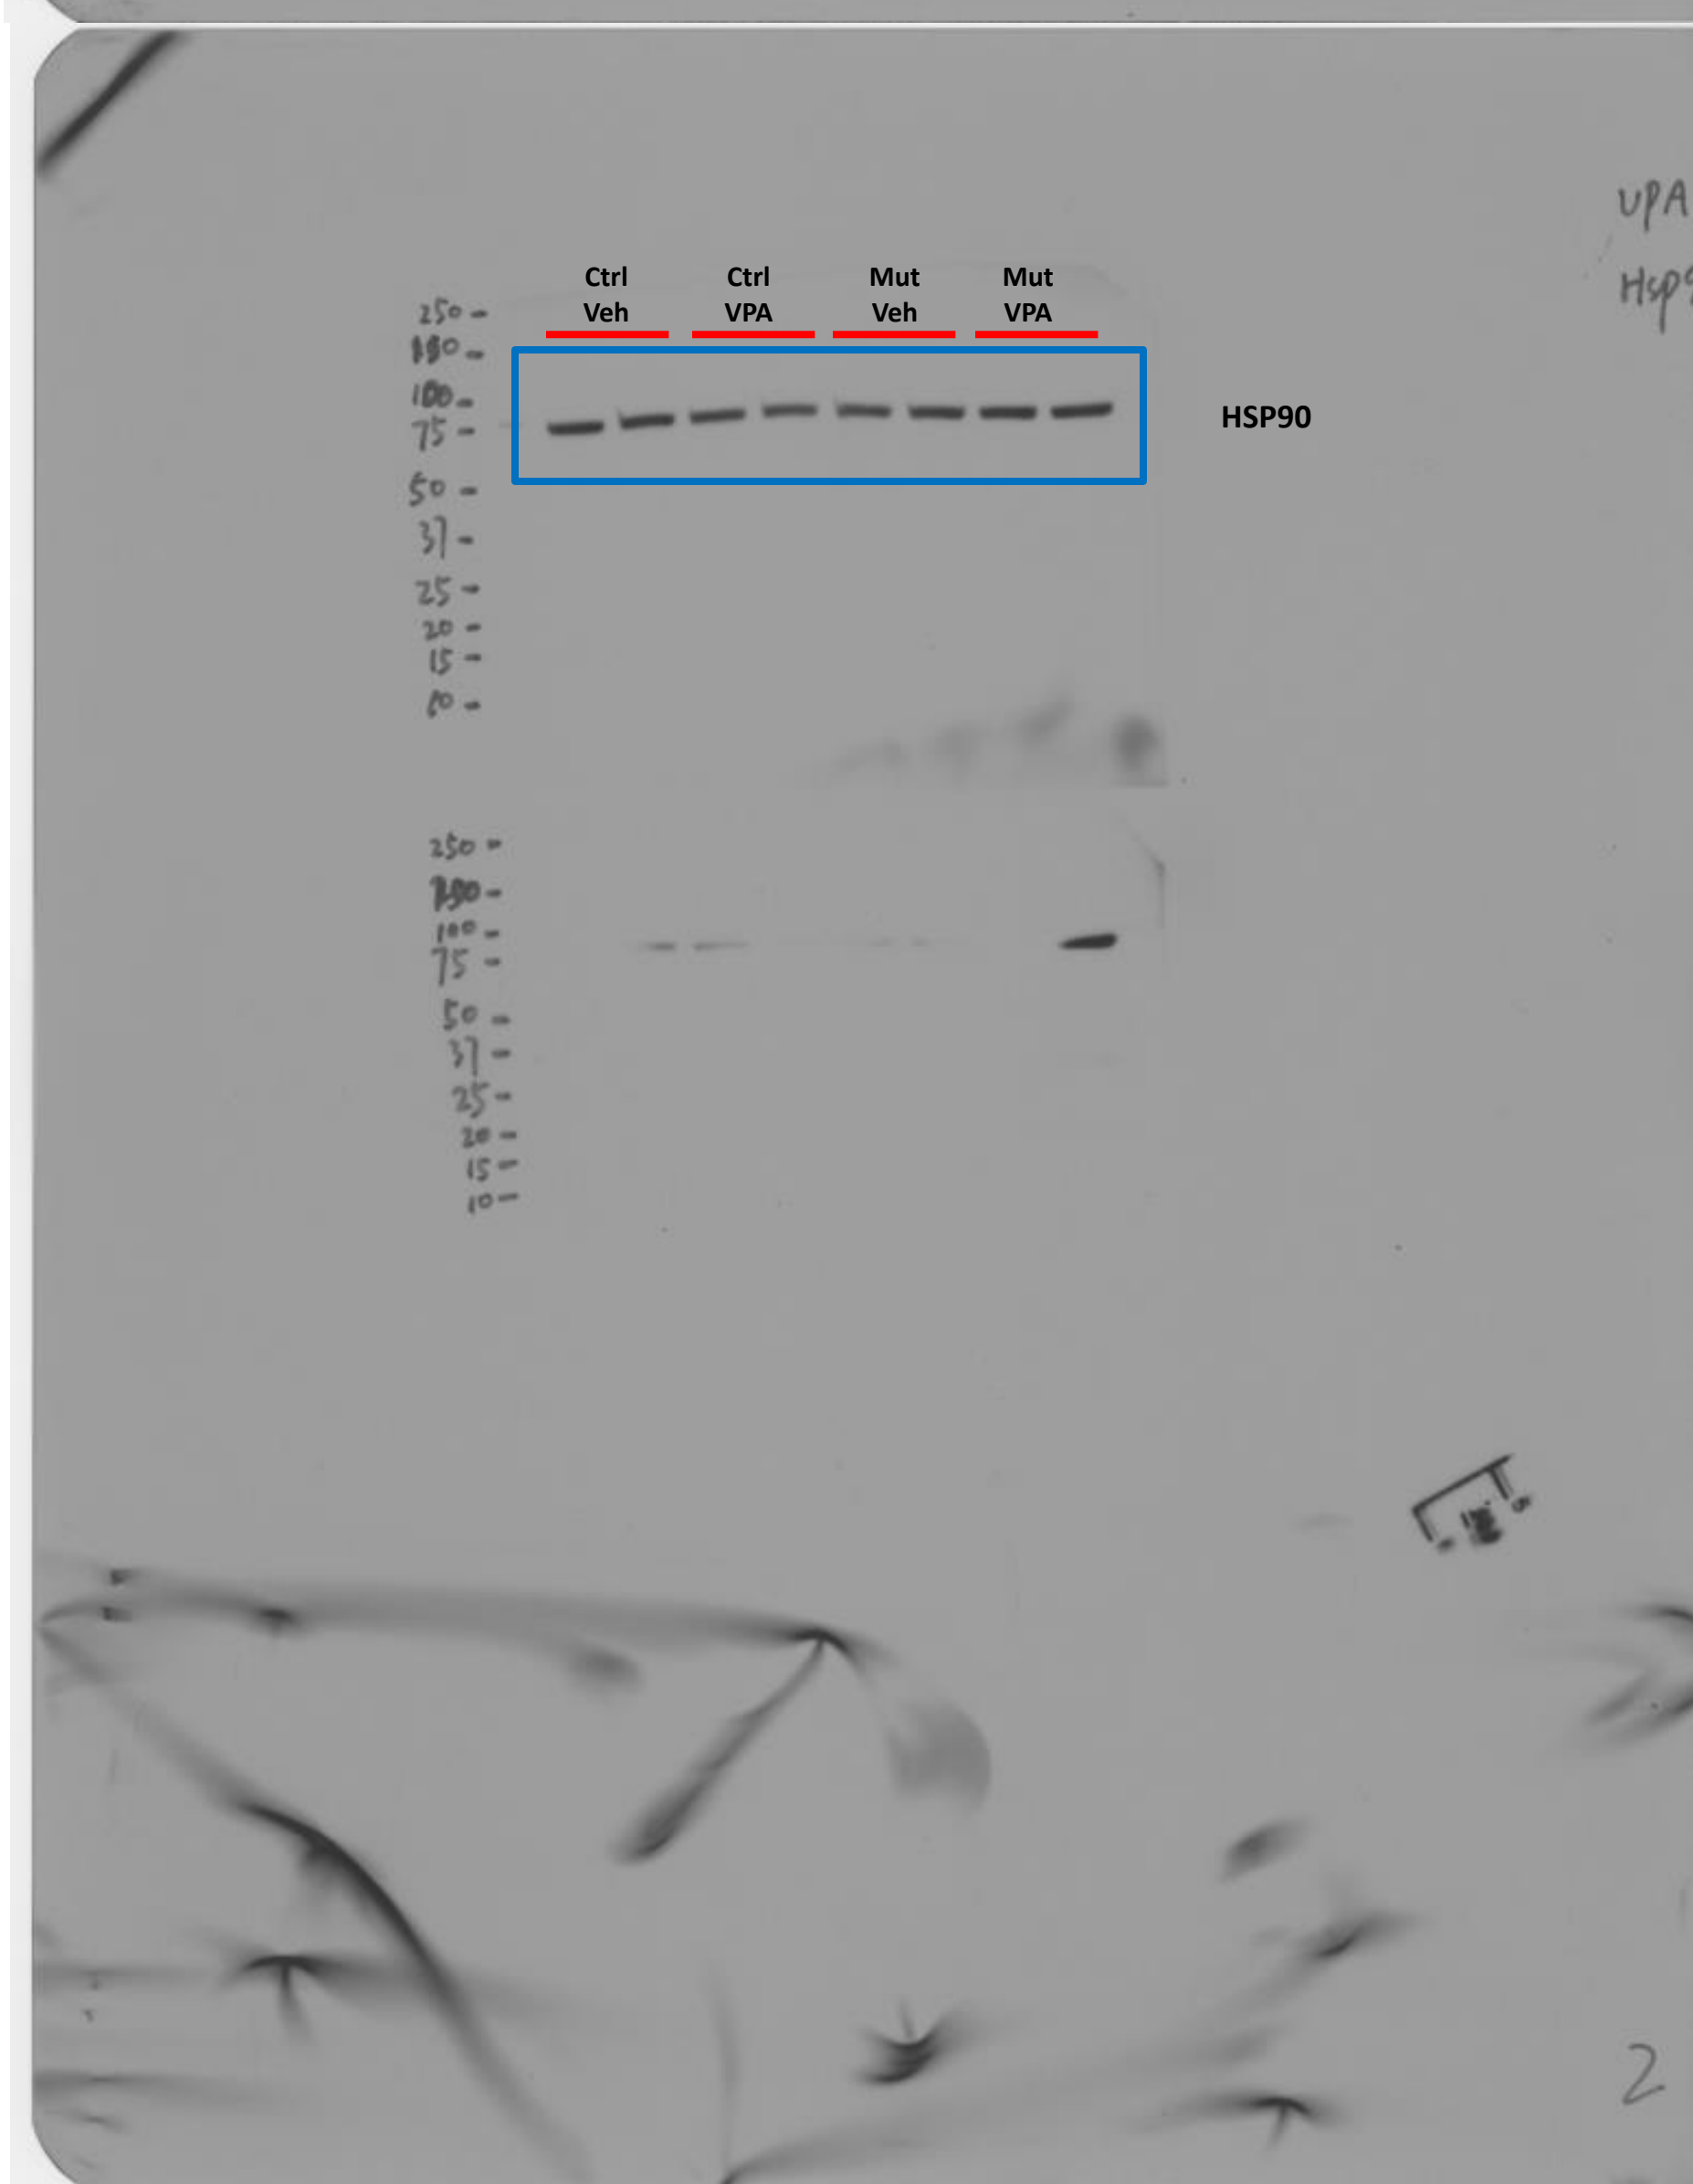

Supplement: supp [file Fig 7I.pdf › Fig 7 Source data/Fig 7I Western blot/Fig 7I.pdf]
